# Supplementary material for: Hamster Sperm Possess Functional Na+/Ca2+-Exchanger 1: Its Implication in Hyperactivation
Source: MDPI journal article supplement (doi:10.3390/ijms24108905), 2023-05-17
Supplement: s1 [file s1]

(A)

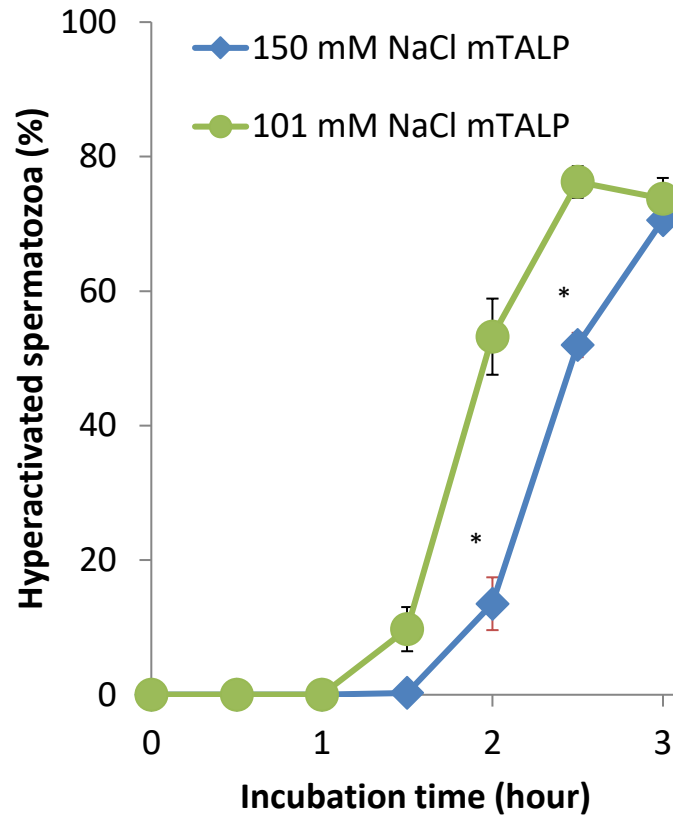

(B)

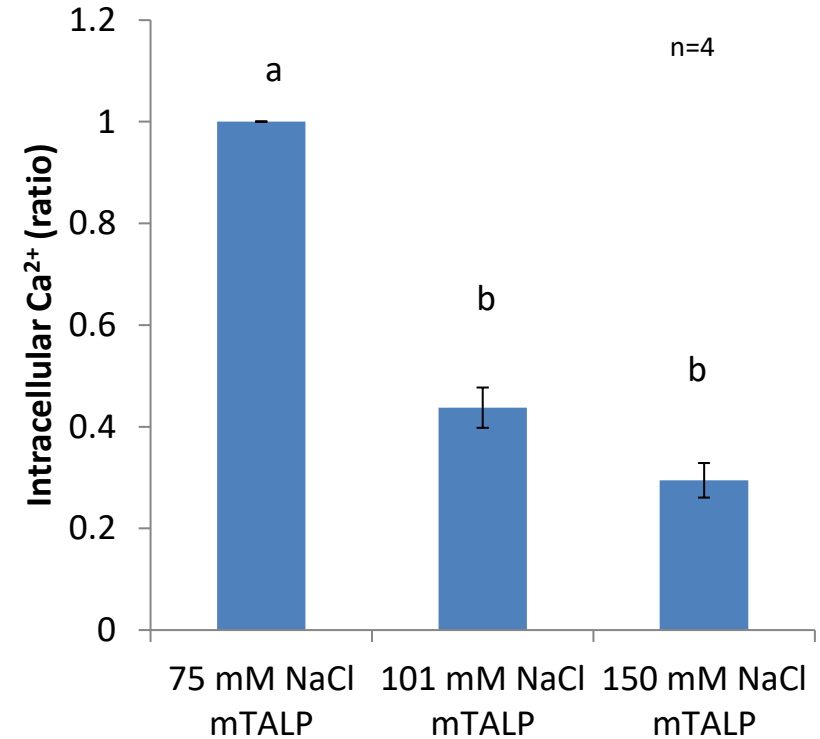

Supplementary Figure S1: NCX-like activity is involved in the regulation of hamster sperm hyperactivation. The effect of extracellular  $\text{Na}^+$  on hyperactivation (A) and intracellular  $\text{Ca}^{2+}$  levels (B) were investigated. \* or different superscripts indicate significant differences among them.
