# Supplementary material for: Hamster Sperm Possess Functional Na+/Ca2+-Exchanger 1: Its Implication in Hyperactivation
Source: MDPI journal article supplement (doi:10.3390/ijms24108905), 2023-05-17
Supplement: s1 [file s1]

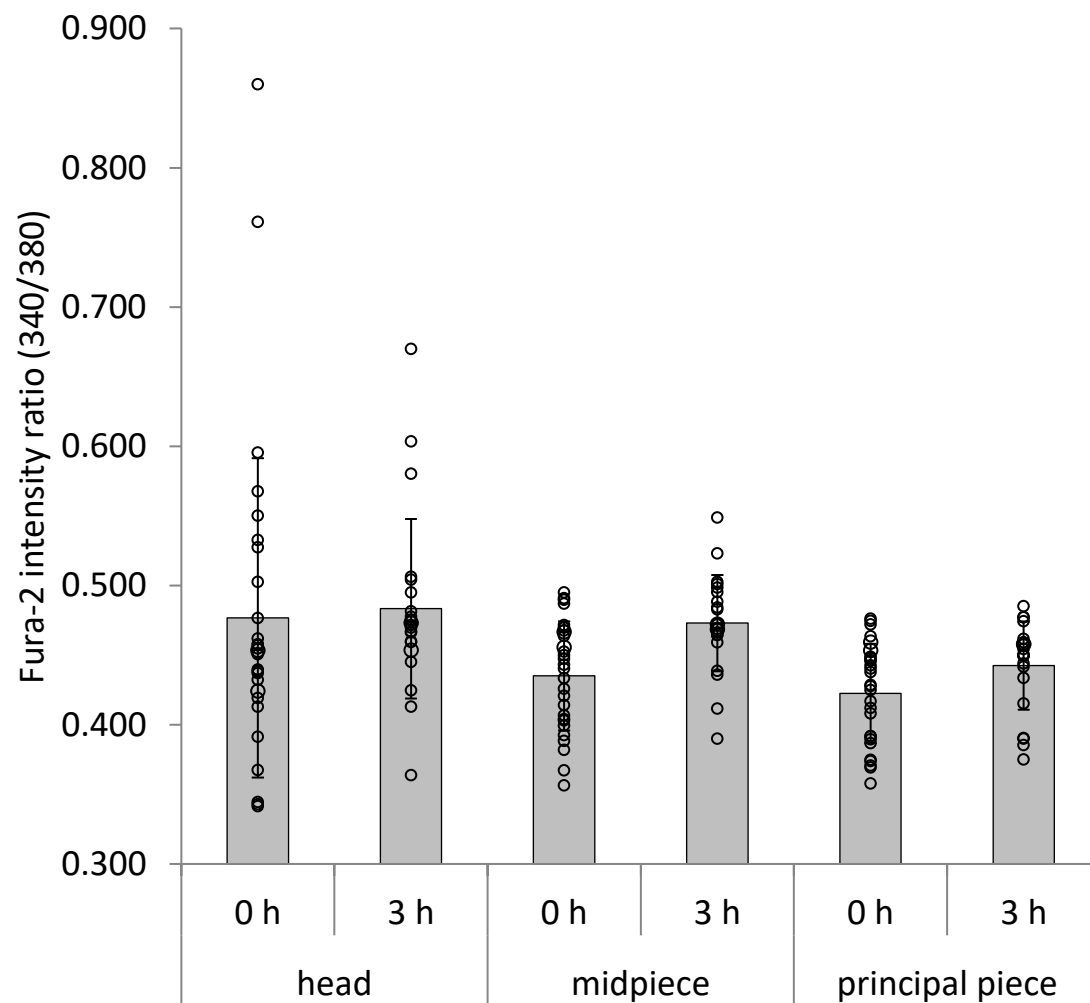

|      | head  |       | midpiece |       | principal piece |       |
|------|-------|-------|----------|-------|-----------------|-------|
|      | 0 h   | 3 h   | 0 h      | 3 h   | 0 h             | 3 h   |
|      | 0.568 | 0.670 | 0.495    | 0.549 | 0.472           | 0.462 |
|      | 0.595 | 0.467 | 0.490    | 0.488 | 0.448           | 0.459 |
|      | 0.462 | 0.481 | 0.407    | 0.495 | 0.371           | 0.454 |
|      | 0.432 | 0.445 | 0.392    | 0.469 | 0.358           | 0.477 |
|      | 0.343 | 0.364 | 0.367    | 0.390 | 0.389           | 0.390 |
|      | 0.437 | 0.504 | 0.404    | 0.464 | 0.387           | 0.415 |
|      | 0.341 | 0.413 | 0.388    | 0.411 | 0.429           | 0.385 |
|      | 0.860 | 0.495 | 0.491    | 0.523 | 0.463           | 0.477 |
|      | 0.503 | 0.506 | 0.403    | 0.459 | 0.374           | 0.442 |
|      | 0.761 | 0.459 | 0.447    | 0.466 | 0.417           | 0.450 |
|      | 0.533 | 0.474 | 0.487    | 0.472 | 0.446           | 0.457 |
|      | 0.440 | 0.460 | 0.472    | 0.464 | 0.474           | 0.450 |
|      | 0.453 | 0.473 | 0.467    | 0.469 | 0.453           | 0.458 |
|      | 0.476 | 0.478 | 0.464    | 0.472 | 0.440           | 0.444 |
|      | 0.457 | 0.475 | 0.450    | 0.501 | 0.425           | 0.450 |
|      | 0.458 | 0.425 | 0.470    | 0.503 | 0.476           | 0.485 |
|      | 0.419 | 0.466 | 0.414    | 0.499 | 0.408           | 0.449 |
|      | 0.455 | 0.603 | 0.433    | 0.436 | 0.392           | 0.390 |
|      | 0.451 | 0.580 | 0.468    | 0.439 | 0.442           | 0.375 |
|      | 0.438 | 0.472 | 0.443    | 0.484 | 0.449           | 0.474 |
|      | 0.424 | 0.454 | 0.456    | 0.472 | 0.459           | 0.458 |
|      | 0.527 | 0.470 | 0.453    | 0.483 | 0.438           | 0.434 |
|      | 0.451 |       | 0.421    |       | 0.446           |       |
|      | 0.550 |       | 0.426    |       | 0.412           |       |
|      | 0.345 |       | 0.356    |       | 0.392           |       |
|      | 0.367 |       | 0.382    |       | 0.369           |       |
|      | 0.391 |       | 0.399    |       | 0.375           |       |
|      | 0.413 |       | 0.440    |       | 0.428           |       |
| mean | 0.477 | 0.483 | 0.435    | 0.473 | 0.423           | 0.443 |
| SD   | 0.115 | 0.064 | 0.039    | 0.035 | 0.036           | 0.032 |

Figure S3 : Enlarged Fig. 4B and raw data of Fura-2 intensity ratio
