# Supplementary material for: Hamster Sperm Possess Functional Na+/Ca2+-Exchanger 1: Its Implication in Hyperactivation
Source: MDPI journal article supplement (doi:10.3390/ijms24108905), 2023-05-17
Supplement: s1 [file s1]

(A)

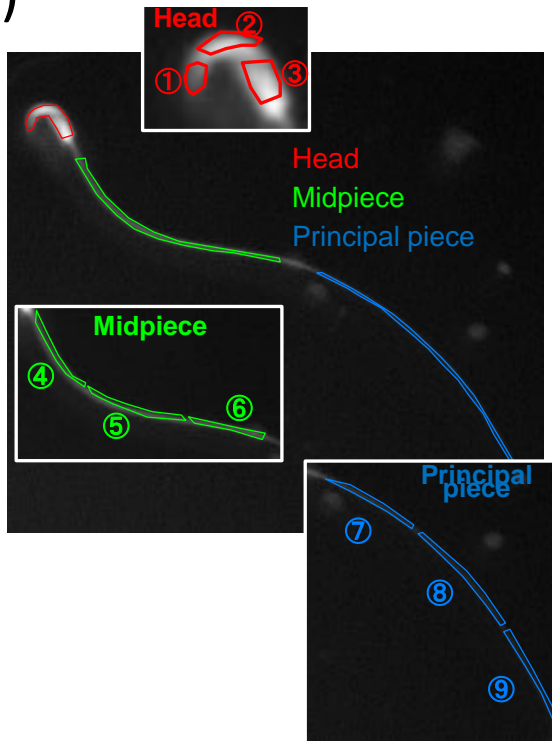

(B)

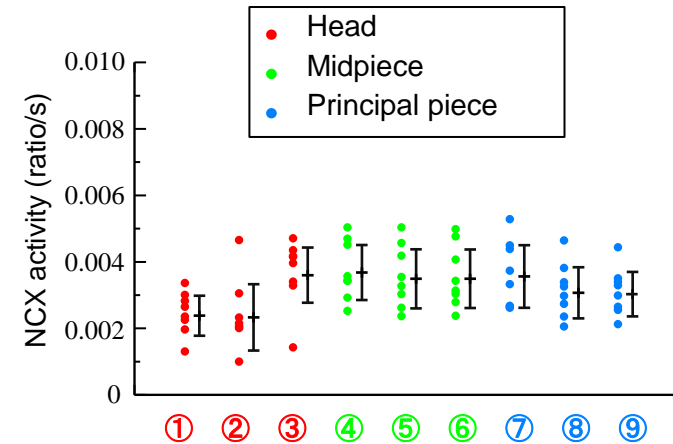

Supplementary Figure S2: The detailed region-specific measurement of NCX activity in hamster. The ROIs for de-tailed measurement (A) and the region-dependent NCX activities were shown (B)
